# Supplementary material for: Influence of Tall Fescue Epichloë Endophytes on Rhizosphere Soil Microbiome
Source: MDPI journal article supplement (doi:10.3390/microorganisms9091843), 2021-08-31
Supplement: s1 [file s1]

**Supplemental Material S1-** Prominent bacterial families (%) present in endophyte infected and endophyte free tall fescue soil

| Phylum          | Order (EI, EF)               | Family                                        | Endophyte Infected (EI) | Endophyte Free (EF) |
|-----------------|------------------------------|-----------------------------------------------|-------------------------|---------------------|
| Proteobacteria  | Rhizobiales (38, 37)         | <i>Bradyrhizobiaceae</i> (N-fix) (Myc-Symb)   | 26                      | 26                  |
|                 |                              | <i>Hyphomicrobiaceae</i> (Phl)                | 13                      | 18                  |
|                 |                              | <i>Rhizobiales_Incertae_Sedis</i> (N-Fix)     | 10                      | 10                  |
|                 |                              | <i>Xanthobacteraceae</i> (N-Fix)              | 35                      | 30                  |
|                 |                              | <i>Rhodobiaceae</i> (N-Fix)                   | 4                       | 6                   |
|                 |                              | <i>Phyllobacteriaceae</i>                     | 4                       | Abs                 |
|                 |                              | <i>Methylobacteriaceae</i> (PGP)              | 3                       | Abs                 |
|                 | Rickettsiales (13, 12)       | <i>Mitochondria</i>                           | 86                      | 77                  |
|                 | Xanthomonadales (6, 14)      | <i>Xanthomonadales_Incertae_Sedis</i>         | 80                      | 75                  |
|                 |                              | <i>Xanthomonadaceae</i> (PP)                  | 5                       | 9                   |
|                 | Rhodospirillales (7, 6)      | <i>Rhodospirillales_Incertae_Sedis</i>        | 20                      | 33                  |
|                 |                              | <i>Rhodospirillaceae</i> (N-fix)              | 14                      | 22                  |
|                 |                              | <i>Acetobacteraceae</i>                       | 26                      | 11                  |
|                 | Nitrosomonadales (8, 9)      | <i>Nitrosomonadaceae</i> (AOB)                | 100                     | 100                 |
|                 | Burkholderiales (7, 3)       | <i>Comamonadaceae</i> (Dntf) (Myc-Symb)       | 38                      | 54                  |
|                 |                              | <i>Burkholderiaceae</i> (PSB) (ZnSb) (DrtTol) | 38                      | 23                  |
|                 |                              | <i>Oxalobacteraceae</i> (Myc-Symb)            | 24                      | 15                  |
|                 | Sphingomonadales (3, 25)     | <i>Sphingomonadaceae</i> (Biocon) (PhlRem)    | 96                      | 100                 |
|                 | Desulfuromonadales (1, 5)    | <i>Geobacteraceae</i> (FeRd) (SlfRB)          | 100                     | 100                 |
|                 | Desulfurellales (5, 4)       | <i>Desulfurellaceae</i> (SlfRB)               | 100                     | 100                 |
| Planctomycetes  | Planctomycetales (88, 100)   | <i>Planctomycetaceae</i> (NH3-Ox)             | 100                     | 95                  |
|                 |                              | <i>Phycisphaeraceae</i>                       | 18                      | 5                   |
| Verrucomicrobia | Chthoniobacteriales (99, 98) | <i>DA101 soil group</i>                       | 86                      | 86                  |
|                 |                              | <i>Xiphinematobacteraceae</i>                 | 3                       | 7                   |
|                 |                              | <i>Chthoniobacteraceae</i>                    | 7                       | 7                   |
|                 | Verrucomicrobiales (6, 2)    | <i>Verrucomicrobiaceae</i>                    | 100                     | 100                 |

|                  |                              |                                              |     |     |
|------------------|------------------------------|----------------------------------------------|-----|-----|
| Bacteroidetes    | Sphingobacteriales (68, 87)  | <i>Sphingobacteriaceae</i> (Biocon)          | 10  | 10  |
|                  |                              | <i>Chitinophagaceae</i>                      | 84  | 89  |
|                  | Cytophagales (7, 8)          | <i>Cytophagaceae</i>                         | 100 | 100 |
|                  | Flavobacteriales (25, 4)     | <i>Flavobacteriaceae</i> (PGPR)              | 98  | 80  |
|                  |                              | <i>NS9 marine group</i>                      | 2   | 20  |
| Nitrospirae      | Nitrospirales (100, 100)     | <i>Nitrospiraceae</i> (NB)                   | 69  | 70  |
|                  |                              | <i>0319-6A21</i> (NB)                        | 31  | 30  |
| Acidobacteria    | Blastocatellales (67,79)     | <i>Blastocatellaceae</i> (Subgroup_4)        | 100 | 100 |
|                  | Acidobacteriales (25,0)      | <i>Acidobacteriaceae</i> (Subgroup_1) (NitR) | 100 | Abs |
|                  | Solibacterales (1,0)         | <i>Solibacteraceae</i> (Subgroup_3)          | 100 | Abs |
| Gemmatimonadetes | Gemmatimonadales (100, 100)  | <i>Gemmatimonadaceae</i>                     | 100 | 100 |
| Actinobacteria   | Solirubrobacterales (27, 43) | <i>Elev-16S-1332</i>                         | 81  | 61  |
|                  |                              | <i>0319-6M6</i>                              | 11  | 11  |
|                  |                              | <i>Solirubrobacteraceae</i>                  | Abs | 11  |
|                  | Micrococcales (17, 21)       | <i>Micrococcaceae</i> (SlntRlf)              | 91  | 100 |
|                  | Gaiellales (20, 10)          | <i>Gaiellaceae</i>                           | 20  | 25  |
|                  | Acidobacteriales (0, 7)      | <i>Acidobacteriaceae</i> (Subgroup_1)        | Abs | 100 |
|                  | Corynebacteriales (10, 0)    | <i>Mycobacteriaceae</i>                      | 100 | Abs |
|                  | Acidimicrobiales (14, 0)     | <i>Acidimicrobiaceae</i>                     | 5   | Abs |
| Chloroflexi      | Anaerolineales (61, 53)      | <i>Anaerolineaceae</i>                       | 100 | 100 |
|                  | Ktedonobacterales (23, 23)   | <i>HSB_OF53-F07</i>                          | 22  | 39  |
|                  |                              | <i>Ktedonobacteraceae</i>                    | 48  | 16  |
|                  |                              | <i>Thermosporotrichaceae</i>                 | 5   | Abs |
|                  | Chloroflexales (5, 5)        | <i>Roseiflexaceae</i>                        | 100 | 100 |
| Firmicutes       | Bacillales (84, 65)          | <i>Bacillaceae</i> (PSB)                     | 80  | 84  |
|                  |                              | <i>Paenibacillaceae</i> (PSB)                | 8   | 10  |
|                  |                              | <i>Alicyclobacillaceae</i>                   | 4   | 6   |
|                  | Clostridiales (6, 13)        | <i>Clostridiaceae</i> 1 (PP)                 | 36  | 40  |
|                  |                              | <i>Gracilibacteraceae</i>                    |     | 10  |
|                  |                              | <i>Peptostreptococcaceae</i>                 | Abs | 30  |
|                  |                              | <i>Ruminococcaceae</i>                       | Abs | 10  |
|                  |                              | <i>Lachnospiraceae</i>                       | 64  | 10  |
|                  | Erysipelotrichales (10, 22)  | <i>Erysipelotrichaceae</i>                   | 100 | 100 |

Abbreviations for bacterial functions within EI and EF rhizosphere soil: AnPhtB, anaerobic photosynthetic bacteria; AOB, Ammonia oxidizing bacteria; BC, bio-controller; DnB, denitrifying bacteria; FBC, fungal bio-controller; FeRB, iron reducing bacteria; N-fix, nitrogen fixing bacteria; NOA, nitrite oxidizing Archaea; NOB, nitrite oxidizing bacteria; NitR, nitrate reducers; ; Pdtx, Phosphate detoxifier; PGP, plant growth promoter; Pht, phototrophic Bacteria; PP, Plant Pathogen; PrSlfB, purple sulfur reducing bacteria; PSB, phosphorus solubilizing bacteria; SlfRB, sulfur reducing bacteria and UD, undetermined. \*Abs = Absent. Percent abundance of order is given in parenthesis for respective families.
