# Supplementary material for: Influence of Tall Fescue Epichloë Endophytes on Rhizosphere Soil Microbiome
Source: MDPI journal article supplement (doi:10.3390/microorganisms9091843), 2021-08-31
Supplement: s1 [file s1]

**Supplemental Material S2-** Prominent fungal genres (%) present in endophyte infected and endophyte free tall fescue soil

| Phylum     | Family (EI, EF)                       | Genus                                      | Endophyte Infected (EI) | Endophyte Free (EF) |
|------------|---------------------------------------|--------------------------------------------|-------------------------|---------------------|
| Ascomycota | Aspergillaceae (8, 5)                 | <i>Aspergillus</i> (PSF)                   | 41                      | 100                 |
|            |                                       | <i>Penicillium</i> (PSF)                   | 59                      | Abs                 |
|            | Chaetomiaceae (5, 5)                  | <i>Humicola</i> (BioRm)                    | 40                      | 100                 |
|            |                                       | <i>Myceliophthora</i> (LigCDgrd)           | 11                      | Abs                 |
|            |                                       | <i>Corynascella</i> (Decomp) (Sidphr)      | 5                       | Abs                 |
|            |                                       | <i>Chaetomium</i> (Decomp) (Sidphr)        | 5                       | Abs                 |
|            |                                       | <i>Acrophialophora</i>                     | 22                      | Abs                 |
|            | Cladosporiaceae (5, 10)               | <i>Cladosporium</i> (BioRm)                | 100                     | 100                 |
|            | Cucurbitariaceae (3, 5)               | <i>Pyrenochaetopsis</i> (N-Ut)             | 100                     | 100                 |
|            | Didymellaceae (4, 10)                 | <i>Neosascochyta</i> (PP)                  | 40                      | 100                 |
|            |                                       | <i>Epicoccum</i> (Biocon) (PP)             | 40                      | Abs                 |
|            |                                       | <i>Didymella</i> (Decomp)                  | 13                      | Abs                 |
|            |                                       | <i>Stagonosporopsis</i> (PP) (MnOx)        | 7                       | Abs                 |
|            | Helotiaceae (1, 5)                    | <i>Scytalidium</i> (SecMtbl)               | 50                      | 100                 |
|            |                                       | <i>Articulospora</i>                       | 50                      | Abs                 |
|            | Herpotrichiellaceae (4, 14)           | <i>Exophiala</i> (BioRm)                   | 54                      | 100                 |
|            |                                       | <i>Phialophora</i> (BioRm)                 | 8                       | Abs                 |
|            | Hypocreaceae (3, 5)                   | <i>Monocillium</i> (Biodg)                 | 30                      | 100                 |
|            |                                       | <i>Trichoderma</i> (Decomp) (Biocon) (PSF) | 70                      | Abs                 |
|            | Hypocreales_fam_Incertae_sedis (3, 5) | <i>Acremonium</i> (BioRm)                  | 75                      | 100                 |
|            |                                       | <i>Sarocladium</i> (PP)                    | 25                      | Abs                 |
|            | Nectriaceae (10, 24)                  | <i>Fusarium</i> (BioFrt) (PP)              | 66                      | 60                  |
|            |                                       | <i>Gibberella</i> (PGPF)                   | 20                      | 40                  |
|            | Periconiaceae (1, 5)                  | <i>Periconia</i>                           | 100                     | 100                 |
|            | Thyridariaceae (1, 5)                 | <i>Roussoella</i> (Decomp)                 | 100                     | 100                 |
|            | Trichomeriaceae (1, 5)                | <i>Knufia</i> (PGPF)                       | 100                     | 100                 |
|            | Apiosporaceae (1, Abs)                | <i>Arthrinium</i> (Decomp)                 | 100                     | Abs                 |
|            | Bionectriaceae (2, Abs)               | <i>Bionectria</i> (PP) (PhHr)              | 12                      | Abs                 |
|            |                                       | <i>Clonostacyis</i> (Biocon)               | 38                      | Abs                 |
|            |                                       | <i>Nectriopsis</i>                         | 50                      | Abs                 |

|  |                               |                                         |     |     |
|--|-------------------------------|-----------------------------------------|-----|-----|
|  | Chaetosphaeriaceae (2, Abs)   | <i>Chloridium</i>                       | 20  | Abs |
|  |                               | <i>Dictyochaeta</i><br>(Decomp)         | 80  | Abs |
|  | Coniochaetaceae (3, Abs)      | <i>Coniochaeta</i><br>(Decomp)          | 50  | Abs |
|  |                               | <i>Lecythophora</i><br>(HgDeTox)        | 50  | Abs |
|  | Cordycipitaceae (1, Abs)      | <i>Cordyceps</i> (BioFert)              | 100 | Abs |
|  | Cyphellophoraceae (2, Abs)    | <i>Cyphellophora</i><br>(N-Ut)          | 100 | Abs |
|  | Dictyosporiaceae (1, Abs)     | <i>Neodendryphiella</i><br>(PP)         | 33  | Abs |
|  |                               | <i>Pseudocoleophoma</i>                 | 33  | Abs |
|  | Didymosphaeriaceae (4, Abs)   | <i>Pseudopithomyces</i><br>(DrtTol)     | 57  | Abs |
|  |                               | <i>Paraconiothyrium</i><br>(MnOx)       | 36  | Abs |
|  |                               | <i>Bimuria</i> (LigCDgrd)               | 7   | Abs |
|  | Lasiosphaeriaceae (2, Abs)    | <i>Arnium</i>                           | 25  | Abs |
|  |                               | <i>Echria</i>                           | 25  | Abs |
|  | Lentitheciaceae (1, Abs)      | <i>Keissleriella</i> (Biocon)           | 33  | Abs |
|  |                               | <i>Poaceascoma</i><br>(LigCDgrd)        | 33  | Abs |
|  | Lindgomycetaceae (2, Abs)     | <i>Chlohesyomyces</i>                   | 80  | Abs |
|  |                               | <i>Hongkongmyces</i>                    | 20  | Abs |
|  | Myrmecridiaceae (1, Abs)      | <i>Mymecridium</i> (PP)                 | 100 | Abs |
|  | Onygenaceae (1, Abs)          | <i>Polytolypa</i> (Biodg)               | 100 | Abs |
|  | Ophiocordycipitaceae (2, Abs) | <i>Purpureocillium</i><br>(PGPF) (PSF)  | 80  | Abs |
|  | Phaeomoniellaceae (2, Abs)    | <i>Pseudophaeomonie<br/>lla</i>         | 100 | Abs |
|  | Phaeosphaeriaceae (4, Abs)    | <i>Didymocyrtis</i>                     | 15  | Abs |
|  |                               | <i>Parastagosphora</i><br>(PP)          | 8   | Abs |
|  |                               | <i>Phaeosphaeria</i><br>(Biodg)         | 16  | Abs |
|  |                               | <i>Phaeosphaeriopsis</i><br>(PhHr)      | 8   | Abs |
|  |                               | <i>Setophoma</i> (PP)                   | 16  | Abs |
|  |                               | <i>Wojnowiciella</i>                    | 8   | Abs |
|  | Plectosphaerellaceae (1, Abs) | <i>Lectera</i>                          | 100 | Abs |
|  | Pleosporaceae (1, Abs)        | <i>Alternaria</i> (PP)                  | 30  | Abs |
|  |                               | <i>Bipolaris</i> (PP)                   | 13  | Abs |
|  |                               | <i>Curvularia</i> (BioFert)<br>(DrtTol) | 100 | Abs |

|               |                                              |                                        |     |     |
|---------------|----------------------------------------------|----------------------------------------|-----|-----|
|               |                                              | <i>Exserohilum</i> (Biocon)            | 4   | Abs |
|               | Pleosporales_fam_Incertae_sedis<br>(1, Abs)  | <i>Pseudorobillarda</i><br>(Biodg)     | 100 | Abs |
|               | Rhytismatales_fam_Incertae_sedis<br>(1, Abs) | <i>Karstenia</i>                       | 100 | Abs |
|               | Sclerotiniaceae (1, Abs)                     | <i>Clarireedia</i> (PP)                | 100 | Abs |
|               | Sporocadaceae (6, Abs)                       | <i>Discosia</i> (PSF)                  | 100 | Abs |
|               | Sporormiaceae (1, Abs)                       | <i>Westerdykella</i><br>(Biodg)        | 100 | Abs |
|               | Stachybotryaceae (1, Abs)                    | <i>Stachybotrys</i> (Biodg)            | 100 | Abs |
|               | Stictidaceae (1, Abs)                        | <i>Neofitzroyomyces</i>                | 100 | Abs |
|               | Sympoventuriaceae (1, Abs)                   | <i>Scolecobasidium</i><br>(BioRm)      | 100 | Abs |
|               | Tetraplosphaeriaceae (1, Abs)                | <i>Tetraplosphaeria</i>                | 100 | Abs |
|               | Torulaceae (1, Abs)                          | <i>Torula</i> (Biodg) (PSF)<br>(PGPF)  | 100 | Abs |
|               | Trichocomaceae (1, Abs)                      | <i>Talaromyces</i> (PSF)               | 75  | Abs |
|               |                                              | <i>Thermomyces</i><br>(ChitinDg) (PSF) | 25  | Abs |
|               | Trichosphaeriaceae (1, Abs)                  | <i>Niagospora</i>                      | 100 | Abs |
|               | Xylariaceae (1, Abs)                         | <i>Annulohpoxylon</i><br>(Biocon)      | 100 | Abs |
| Basidiomycota | Agaricaceae (3, 2)                           | <i>Chlorophyllum</i><br>(BioFert)      | Abs | 100 |
|               |                                              | <i>Lepiota</i> (Biodg-sap)             | 50  | Abs |
|               | Cortinariaceae (8, 85)                       | <i>Cortinarius</i> (N-Ut)              | 100 | 100 |
|               | Hydnodontaceae (12, 6)                       | <i>Disciseda</i> (Slst)                | Abs | 100 |
|               |                                              | <i>Trechispora</i>                     | 100 | Abs |
|               | Lycoperdaceae (11, 6)                        | <i>Arachnion</i>                       | 38  | Abs |
|               |                                              | <i>Holocotylon</i>                     | 25  | Abs |
|               |                                              | <i>Lycoperdon</i><br>(Biodg-sap)       | 25  | Abs |
|               | Bolbitiaceae (1, Abs)                        | <i>Conocybe</i> (PP)                   | 100 | Abs |
|               | Bondarzewiaceae (1, Abs)                     | <i>Heterobasidion</i><br>(Biodg) (PP)  | 100 | Abs |
|               | Bulleribasidiaceae (1, Abs)                  | <i>Hannaella</i>                       | 100 | Abs |
|               | Corticiaceae (4, Abs)                        | <i>Limonomyces</i> (PP)                | 100 | Abs |
|               | Cyphellaceae (3, Abs)                        | <i>Henningsomyces</i><br>(LigDgrd)     | 100 | Abs |
|               | Entolomataceae (3, Abs)                      | <i>Clitopilus</i> (ZnSF)<br>(FeSF)     | 100 | Abs |
|               |                                              | <i>Entoloma</i>                        | 100 | Abs |

|                   |                              |                                            |     |     |
|-------------------|------------------------------|--------------------------------------------|-----|-----|
|                   | Erythrobasidiaceae (14, Abs) | <i>Bannoa</i> (Biodg)<br>(FermAg)          | 100 | Abs |
|                   | Malasseziaceae (3, Abs)      | <i>Malassezia</i> (Path)                   | 100 | Abs |
|                   | Nidulariaceae (11, Abs)      | <i>Cyathus</i><br>(Biodg-sap)              | 100 | Abs |
|                   | Piskurozymaceae (1, Abs)     | <i>Solicoccozyma</i><br>(PsychT)           | 100 | Abs |
|                   | Psathyrellaceae (3, Abs)     | <i>Coprinellus</i><br>(HMAccm)             | 100 | Abs |
|                   | Russulaceae (3, Abs)         | <i>Russula</i> (MHB-F)                     | 100 | Abs |
|                   | Schizoporaceae (5, Abs)      | <i>Oxyporus</i> (antVOCs)                  | 100 | Abs |
|                   | Sporidiobolaceae (3, Abs)    | <i>Rhodotorula</i> (Biodg)<br>(PSF) (PGPF) | 100 | Abs |
|                   | Strophariaceae (3, Abs)      | <i>Stropharia</i>                          | 100 | Abs |
|                   | Ustilaginaceae (5, Abs)      | <i>Anthracozytis</i>                       | 25  | Abs |
|                   |                              | <i>Ustilago</i> (PP) (FeRd)<br>(Antbio)    | 50  | Abs |
| Chytridiomycota   | Rhizophlyctidaceae (27, Abs) | <i>Rhizophlyctis</i><br>(CmCbDm)           | 100 | Abs |
|                   | Spizellomycetaceae (37, Abs) | <i>Spizellomyces</i> (PP)                  | 75  | Abs |
| Mortierellomycota | Mortierellaceae (87, 100)    | <i>Mortierella</i> (BioFert)               | 100 | 100 |
|                   | Rhizopodaceae (13, Abs)      | <i>Rhizopus</i><br>(HydDeg)(PSF)           | 100 | Abs |
| Kickxellomycota   | Kickxellaceae (100, Abs)     | <i>Ramicandelaber</i>                      | 100 | Abs |
| Glomeromycota     | Glomeraceae (100, Abs)       | <i>Oehlia</i> (AMF)(DrtTol)                | 67  | Abs |
|                   | Paraglomeraceae (100, Abs)   | <i>Paraglomus</i> (AMF)<br>(DrtTol)        | 100 | Abs |

Abbreviations for bacterial functions within EI and EF rhizosphere soil: AMF; Arbuscular Mycorrhiza Fungi, Biocon; Bio-controller, BioFert; Bio-fertilizers, PSF; Phosphorus Solubilizing Fungi, BioRm; Bio-remediation, BioDg; Biodegrader, LigCDgrd; Ligno-cellulose Degradation, Decomp; Decomposer, Sidphr; Siderophore producers, N-Ut; Nitrogen Utilizer, PP; Plant Pathogen, MnOx; Manganese Oxidizers, Metblt; Secondary Metabolizers, PGPF; Plant Growth Promoting Fungi, PhtHr; Phytohormone Producer, HgDeTox; Mercury De-toxifying, DrtTol; Draught Tolerance, ChitiDg; Chitin Degradation, Sltst; Salt Stress, Biodg-sap; Bio degrader – saprophyte, ZnSF; Zinc Solubilizing Fungi, FeSF; Iron Solubilizing Fungi, FermAg; Fermenting Agent, Path; Pathogen, PsychT; Cold Tolerance, FeRd; Iron Reducing Fungi, Antibio; Anti-biosis, CmCbDg; Complex-Carbohydrate degrader, HydDeg; Hydrocarbon Degradation; and, Abs = Absent.
